# Supplementary material for: Synthesis and Characterization of Silica–Tantala Microporous Membranes for Gas Separations Fabricated Using Chemical Vapor Deposition
Source: MDPI journal article supplement (doi:10.3390/membranes12090889), 2022-09-16
Supplement: s1 [file s1]

# Synthesis and Characterization of Silica-Tantala Microporous Membranes for Gas Separations Fabricated Using Chemical Vapor Deposition

Sean-Thomas B. Lundin <sup>1,2</sup>, Hongsheng Wang <sup>1</sup> and S. Ted Oyama <sup>1,3,4,\*</sup>

<sup>1</sup> Department of Chemical System Engineering, The University of Tokyo, 7-3-1 Hongo, Bunkyo-ku, Tokyo 113-8556, Japan

<sup>2</sup> National Institute of Advanced Industrial Science and Technology (AIST), Research Institute of Chemical Process Technology, 4-2-1 Nigatake, Miyagino-ku, Sendai 983-8551, Japan

<sup>3</sup> College of Chemical Engineering, Fuzhou University, Fuzhou 350116, China

<sup>4</sup> Department of Chemical Engineering, Virginia Tech, Blacksburg, VA 24061, USA

\* Correspondence: oyama@vt.edu; Tel.: +81-3-5841-0712

## S.1. SEM surface micrographs

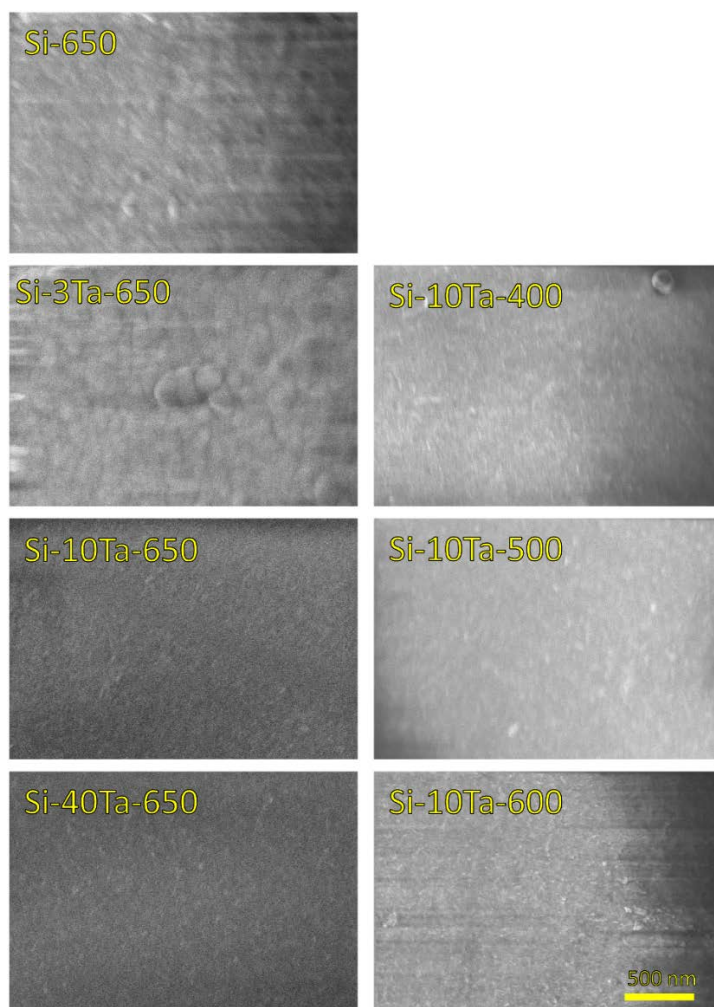

Figure S1. SEM surface micrographs of each membrane surface.

## S.2. XANES spectra

The X-ray absorption near edge spectra (XANES) measurements in the Ta  $L_{III}$ -edge region (9841 eV – 9946 eV) were performed at the Institute of Materials Structure Science, High-Energy Accelerator Research Organization (KEK-IMSS) in Tsukuba, Japan. Either fluorescence or transmission mode was used. Transmittance measurements were conducted at the Photon Factory (PF) beamline BL9C, using X-rays generated at 2.5 GeV with a beam current of 450 mA; the monochromator was detuned to eliminate higher harmonics included in the incident beam and the measurements were recorded in a step scanning mode using ionization chambers filled with 100% N<sub>2</sub> for the detectors of the incident X-ray beam ( $I_0$ ) and 15% Ar in N<sub>2</sub> for the transmitted beam ( $I$ ). Fluorescence measurements were conducted at the Photon Factory Advanced Ring (PF-AR) beamline NW10A, using X-rays generated at 6.5 GeV and 50 mA, the measurements were recorded in a step scanning mode using ionization chambers filled with 100% N<sub>2</sub> for the detector of the incident X-ray beam ( $I_0$ ) and a multi-channel Ge solid state detector (SSD) for that of the fluorescence beam ( $I$ ). Scan times on the samples were 60 s using transmittance modes or 17.5 min per scan for the fluorescence mode. Samples were prepared by scraping the surface of the membrane support using a spatula and collecting the silica particles. All measurements were conducted at room temperature and open to atmosphere.

The XANES analysis was not able to detect any Ta within the samples. The XANES XRF spectra of Si-10Ta-650 are presented in Figure S1, which shows that the spectra taken before and after the Ta  $L_3$ -edge are similar, suggesting no Ta within this sample. A similar test was conducted using a sample of Si-40Ta-650 using transmittance mode, but no change in the spectra before and after the expected Ta region could be detected. These results suggest the deposition of tantalum was exceedingly slow compared to silica during CVD synthesis, consistent with EDS and XPS results.

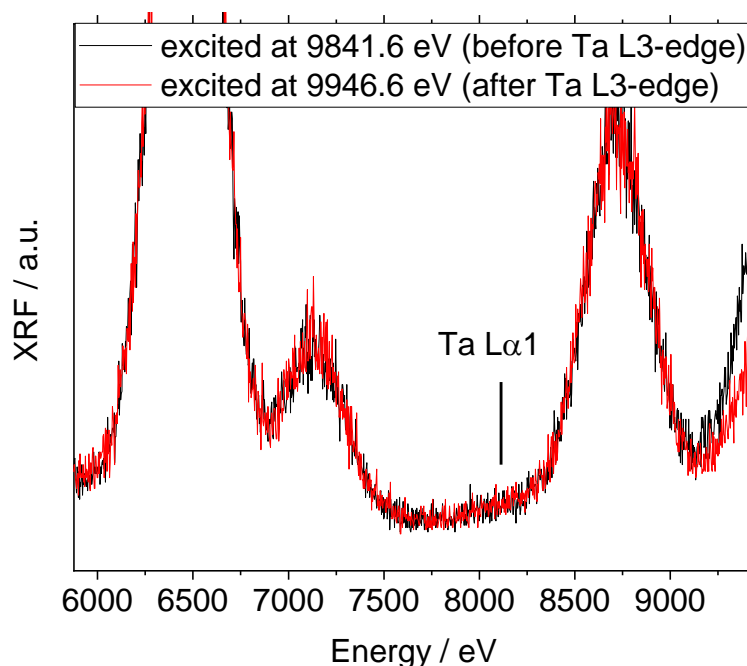

**Figure S1.** XANES XRF spectra using a fluorescence detector on membrane Si-10Ta-650.

### S.3. XPS raw data

**Table S1.** Raw peak fitting results for the XPS of all tested membranes. Peak fitting was performed on the data with no manipulation, and peaks have not been shifted based on the C1s position. The C1s peak was undetected for all membranes after the 30 s sputter, so no position is known to account for localized charging.

| Element<br>Peak | Membrane<br>ID | Before Sputtering |      |        |       | After Sputtering |      |        |       |
|-----------------|----------------|-------------------|------|--------|-------|------------------|------|--------|-------|
|                 |                | Position          | FWHM | Height | Area  | Position         | FWHM | Height | Area  |
| C1s             | Si-650         | 284.1             | 1.60 | 1295   | 2333  | -                | -    | -      | -     |
|                 | Si-3Ta-650     | 283.9             | 1.39 | 518    | 1100  | -                | -    | -      | -     |
|                 | Si-10Ta-650    | 284.0             | 1.53 | 1588   | 3534  | -                | -    | -      | -     |
|                 | Si-40Ta-650    | 284.0             | 1.22 | 616    | 1188  | -                | -    | -      | -     |
|                 | Si-10Ta-600    | 284.0             | 1.54 | 691    | 1375  | -                | -    | -      | -     |
|                 | Si-10Ta-500    | 284.1             | 1.55 | 256    | 523   | -                | -    | -      | -     |
|                 | Si-10Ta-400    | 284.2             | 1.54 | 296    | 854   | -                | -    | -      | -     |
| O1s             | Si-650         | 532.2             | 1.65 | 11064  | 19438 | 532.6            | 1.87 | 11861  | 23609 |
|                 | Si-3Ta-650     | 532.0             | 1.54 | 14322  | 23440 | 532.6            | 1.74 | 14942  | 27814 |
|                 | Si-10Ta-650    | 531.3             | 1.91 | 8487   | 17234 | 532.1            | 2.11 | 10780  | 24199 |
|                 | Si-40Ta-650    | 532.1             | 1.42 | 16531  | 24922 | 532.4            | 1.98 | 13145  | 27751 |
|                 | Si-10Ta-600    | 531.9             | 1.62 | 10316  | 17802 | 532.3            | 2.02 | 10852  | 23317 |
|                 | Si-10Ta-500    | 532.0             | 1.70 | 13494  | 24386 | 532.4            | 2.16 | 12176  | 28031 |
|                 | Si-10Ta-400    | 531.9             | 1.79 | 11156  | 21298 | 532.3            | 2.11 | 10866  | 24418 |
| Al2p            | Si-650         | -                 | -    | -      | -     | 75.0             | 1.47 | 35     | 55    |
|                 | Si-3Ta-650     | -                 | -    | -      | -     | -                | -    | -      | -     |
|                 | Si-10Ta-650    | 74.0              | 1.62 | 759    | 1312  | 75.0             | 1.69 | 1372   | 2466  |
|                 | Si-40Ta-650    | 74.4              | 1.68 | 334    | 598   | 75.2             | 1.69 | 840    | 1510  |
|                 | Si-10Ta-600    | 74.2              | 1.56 | 358    | 594   | 74.6             | 2.2  | 569    | 1332  |
|                 | Si-10Ta-500    | 74.2              | 1.36 | 844    | 1218  | 75.3             | 1.67 | 1547   | 2757  |
|                 | Si-10Ta-400    | 74.1              | 1.53 | 736    | 1201  | 75.2             | 1.64 | 1461   | 2552  |
| Si2p            | Si-650         | 102.9             | 1.99 | 2577   | 5470  | 103.4            | 1.91 | 3273   | 6820  |
|                 | Si-3Ta-650     | 102.7             | 1.67 | 3518   | 6357  | 103.4            | 1.81 | 3868   | 7449  |
|                 | Si-10Ta-650    | 102.3             | 1.73 | 1443   | 2658  | 103.0            | 2.03 | 1556   | 3364  |
|                 | Si-40Ta-650    | 102.8             | 1.65 | 3332   | 5886  | 103.2            | 1.96 | 2489   | 5206  |
|                 | Si-10Ta-600    | 102.7             | 1.68 | 2302   | 4215  | 103.2            | 1.91 | 1930   | 3923  |
|                 | Si-10Ta-500    | 102.8             | 1.66 | 2739   | 5016  | 103.3            | 1.9  | 1803   | 3732  |
|                 | Si-10Ta-400    | 102.7             | 1.71 | 2136   | 4076  | 103.2            | 1.85 | 1420   | 2801  |
